# Supplementary material
Source: Springer Nature journal article supplement (https://www.springermedizin.de/resource/supplementary/12990_2008_156_MOESM2_ESM.pdf/9612688)

**A**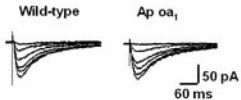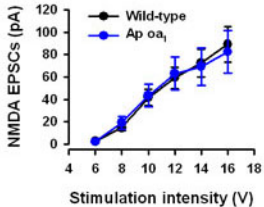**B**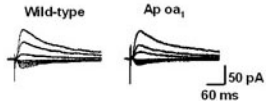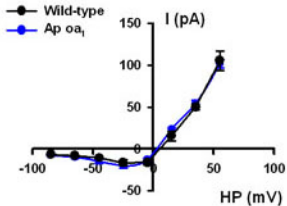

Supplement: MOESM2 [file 9612688]
